# Supplementary material
Source: Springer Nature journal article supplement (https://www.springermedizin.de/resource/supplementary/12916_2011_413_MOESM5_ESM.pdf/9599902)

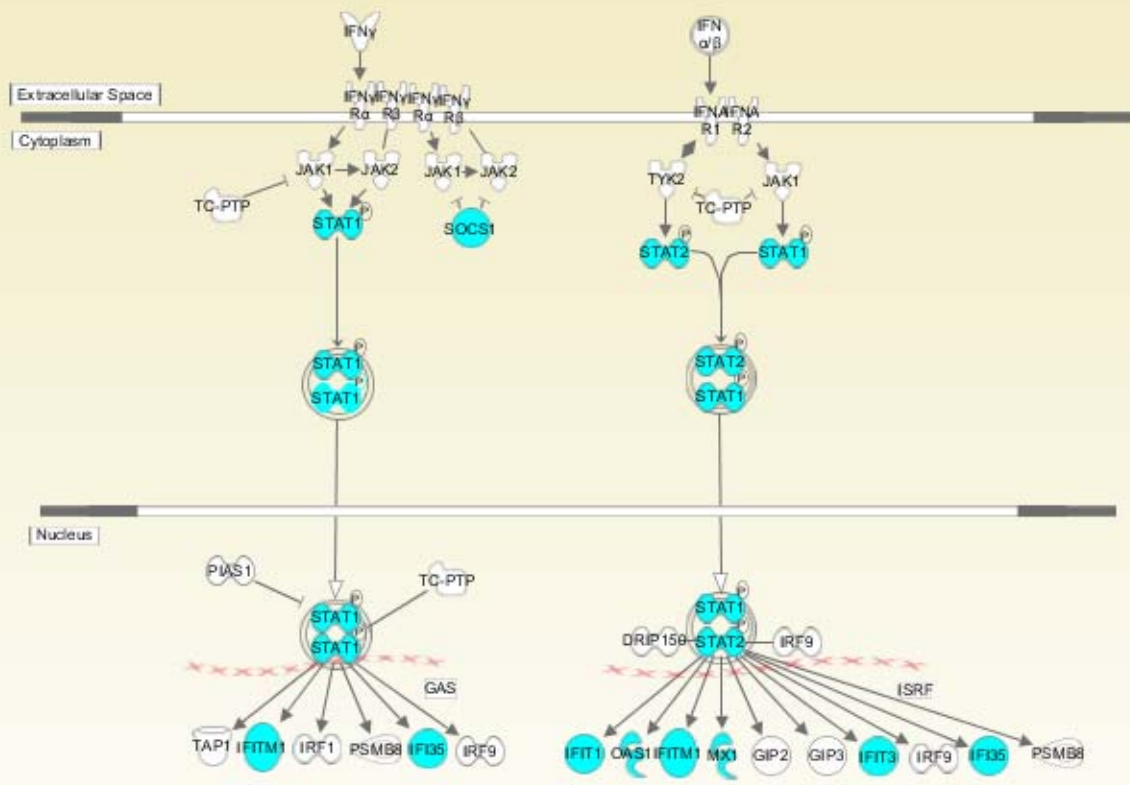

Supplement: MOESM5 [file 9599902]
